1 **Diagnosis of *Centrocestus formosanus* Infection in Zebrafish (*Danio rerio*): A Window**  
2 **on a New Globalization-Derived Invasive Parasite.**

3  
4 **Running Title:** Diagnosis of *C. formosanus* Infection in Zebrafish

5  
6 Antonino Pace<sup>a</sup>, Ludovico Dipineto<sup>a</sup>, Serena Aceto<sup>b</sup>, Maria Concetta Censullo<sup>b</sup>, Maria  
7 Carmen Valoroso<sup>b</sup>, Lorena Varriale<sup>a</sup>, Laura Rinaldi<sup>a</sup>, Lucia Francesca Menna<sup>a</sup>, Alessandro  
8 Fioretti<sup>a</sup>, Luca Borrelli<sup>a\*</sup>

9  
10 <sup>a</sup>Department of Veterinary Medicine and Animal Productions, Università degli Studi di  
11 Napoli Federico II, via Delpino 1, 80137, Naples, Italy

12 <sup>b</sup>Department of Biology, Università degli Studi di Napoli Federico II, via Cintia 26, 80126,  
13 Naples, Italy

14  
15 **Email addresses:**

16 Antonino Pace – antonino.pace@unina.it

17 Ludovico Dipineto – ludovico.dipineto@unina.it

18 Serena Aceto – serena.aceto@unina.it

19 Maria Concetta Censullo – mariaconcettacensullo@gmail.com

20 Maria Carmen Valoroso – mariacarmen.valoroso@unina.it

21 Lorena Varriale – lorena.varriale@unina.it

22 Laura Rinaldi – laura.rinaldi@unina.it

23 Lucia Francesca Menna – menna@unina.it

24 Alessandro Fioretti –fioretti@unina.it

25 Luca Borrelli\* –luca.borrelli@unina.it

26

27 \*Corresponding author

28

29 **Keywords:** Digenetic trematodes; Gill fluke; Invasive species; Molecular diagnosis; PCR;

30 Zoonosis

31

32 **Abstract**

33 *Centrocestus formosanus* a digenetic trematode with a complex life cycle, involving  
34 invertebrate and vertebrate hosts, humans included. In particular, it causes gill lesions and  
35 mortality in freshwater fish species, and gastrointestinal symptoms in infected humans.

36 Here, we describe the occurrence of *C. formosanus* infection in zebrafish imported in Italy.

37 Gill arches of 30 zebrafish were examined for the presence of encysted metacercariae under  
38 a stereomicroscope, and processed through molecular analyses targeting the ribosomal  
39 Internal Transcribed Sequence 2 (ITS2) using species-specific primers of *C. formosanus*.

40 Encysted metacercariae were found on the gills of 20/30 zebrafish and all were identified as  
41 *C. formosanus*.

42 Despite *C. formosanus* distribution was originally restricted to Asia, it has been  
43 subsequently reported in new countries, revealing itself as an invasive species, and raising

44 important concerns for biodiversity, economy, animal and public health. Given the crucial

45 role likely played by the ornamental fish industry in the spreading of this parasite, there is an

46 urgent need for control measures to prevent the introduction and establishment of *C.*

47 *formosanus* in non-endemic areas, Europe included. An adequate surveillance and health-

48 monitoring program should be conducted in the development of microbiological and

49 epidemiological approaches to diagnose and face these new globalization-derived invasive

50 species.

51

52 **Introduction**

53 Digenea are considered the largest group of internal metazoan parasites, including about  
54 18,000 species [1]. They are almost ubiquitous, parasitizing a wide variety of vertebrate and  
55 invertebrate groups as intermediate or definitive hosts [1,2]. The importance of digenetic  
56 trematode infections in animals and humans has attracted much attention from different  
57 disciplines, in particular veterinary medicine. Indeed, most of digenetic trematode  
58 metacercariae are detected in freshwater fish hosts [2,3], and fish-borne zoonotic trematodes  
59 represent a concerning health issue in many Asian countries[2,4–6]. Already 20 years ago,  
60 the World Health Organization estimated more than 18 million of humans infected with fish-  
61 borne trematodes, and more than half a billion people at risk of infection worldwide[7,8]. In  
62 particular, the family Heterophyidae stood out for its clinical importance in humans, causing  
63 gastrointestinal and extra-intestinal infections[8–11].

64 Within fish-borne trematodes, *Centrocestus formosanus* is a small heterophyid fluke,  
65 described for the first time in Taiwan [12], and widely distributed in Asia [4,5,13–17]. Since  
66 the 1950's, several authors have reported the introduction of this species in new continents,  
67 although its occurrence might still be underestimated [15,18–26]. *C. formosanus*, similarly to  
68 other digenetic trematodes, exhibits a complex life cycle, as described by Nishigori[12]. The  
69 adults reside in the small intestine of vertebrate definitive hosts, such as birds and mammals.  
70 Eggs produced by adult trematodes hatch into miracidia, which use a thiarid snail as first  
71 intermediate host to develop into cercariae. Subsequently, free-swimming cercariae encyst in  
72 second intermediate fish hosts, specifically in the gills, where they develop into  
73 metacercariae. Piscivorous birds and mammals, ingesting the infected fish, complete the  
74 cycle[4,11-13,16,18,19,24–29]. Analogously, human infections might occur through  
75 consumption of raw or improperly cooked fish containing metacercariae[6]. The parasite is  
76 highly specialized to its first intermediate snail host, *Melanooides tuberculata*[14,31]. On the  
77 contrary, several freshwater fish species might be infected, suggesting *C. formosanus* as a  
78 generalist parasite with a broad host range in second intermediate fish species[4,6,13,22–

79 24,26,29,31,32].Therefore, pathogenicity evaluation is valuable for both wild and  
80 farmed(food and ornamental) fish[20]. Indeed, *C. formosanus*, causing severe lesions in the  
81 gills [23,24,26]with the resultant respiratory disorders, loss of production and death, is  
82 rightfully considered responsible for important economic losses in aquaculture  
83 [12,16,18,19,21–23,25,29,31-34].

84 Among the numerous freshwater fish species affected by *C. formosanus*[19,20,31], zebrafish  
85 (*Danio rerio*) has been suggested as susceptible to infection, but only three reports have  
86 been described to date [15,34,37], with a relative low prevalence (20%, 43%, and 5%  
87 respectively).

88 *Danio rerio* is a freshwater fish native to Asia, although it is widely distributed worldwide,  
89 probably due to aquarists' and researchers' predilection for it in home aquaria as well as  
90 animal model[38]. Indeed, the similarities between zebrafish and mammals led to a rapid  
91 increase in the use of zebrafish in scientific research, especially in developmental biology,  
92 neuroscience and behavioral research, and it proved to be more advantageous over previous  
93 model organisms[38,39].

94 The on-going growth of the ornamental fish industry, which includes more than 120  
95 countries in the import and export of approximately 1.5 billion ornamental fish per year  
96 [40], has led to the appearance of problems in supply, traceability, sustainability,  
97 susceptibility to disease, and antibiotic resistance, which affect the trade[41].

98 Given the importance of *C. formosanus* infection and dissemination for animal and public  
99 health, and the implications for aquaculture, research and food safety, epidemiological  
100 investigations should be conducted in new geographical regions, in order to implement  
101 appropriate preventive and control measures [18].

102 The present study reports on the occurrence of *C. formosanus metacercariae* in the gills of  
103 zebrafish previously intended for research. To the authors' knowledge, this is the second  
104 report of *C. formosanus* infections in zebrafish imported in Italy[37].Since the scarce and

105 fragmentary data present in the European literature [29,42]are probably due to  
106 underestimated and under diagnosed expert evaluation, we propose to increase the  
107 awareness and ameliorate the diagnostic investigations to shed light on this zoonosis by  
108 morphological and molecular approach. In particular, we propose for the first time a fast and  
109 specific diagnostic method based of species-specific PCR primers to detect the presence of  
110 this new invasive species.

111

## 112 **Material and Methods**

### 113 *Animal Maintenance*

114 A total of 30 zebrafish, previously intended for research, was examined. All fish were male  
115 and female adult (4-6 month old) of heterozygous “wild type” strain, obtained from local  
116 commercial distributor. Fish were housed in groups of ten per 30 L tank, previously filled  
117 with deionized water, following an acclimation period of two weeks. Fish were fed two  
118 times daily with sterilized commercial food (Sera Vipagran, Germany). The room and water  
119 temperatures were maintained at 25–27 °C. Illumination ( $1010 \pm 88$  lx) was provided by  
120 ceiling-mounted fluorescent light tubes on a 14-h cycle (D:N = 14h:10h) consistent with the  
121 standards of zebrafish care[39,43].

122 Fish were treated in accordance with the Directive of the European Parliament and of the  
123 Council on the Protection of Animals Used for Scientific Purposes (directive 2010/63/EU)  
124 and in agreement with the Bioethical Committee of University Federico II of  
125 Naples(authorization protocol number 47339-2013).

126 During standard physical examination, performed under anesthesia by immersion in ethyl 3-  
127 aminobenzoate methane sulfonic acid solution (MS-222 at dose of 0.168 mg/ml) [39,43], the  
128 gills of 20 zebrafish were found to be affected by small white spots, ascribable to parasitic  
129 cysts (Fig. 1).Therefore, fish were not destined to research activities. The animals were

130 euthanized by immersion in overdose 500 mg/ L of MS-222 buffered to pH 7.4 (Sigma–  
131 Aldrich, USA).

132

### 133 *Centrocestus formosanus* Examination and Identification

134 Fish bodies were dissected, as reported in Borrelli et al. [39], and gill arches were removed  
135 with the aid of a stereomicroscope and prepared as wet mounts to be examined for the  
136 presence of encysted metacercariae[6,10,13,15,23,24,31,32,34,35]. Encysted metacercariae  
137 were examined under a light microscope to evaluate their morphology (Fig. 2)[10,44,45] and  
138 identified according to published characteristics [6,11-13–15,20,24,25,30] Live encysted  
139 metacercariae were also recorded at 40X using a Leica light microscope(S1 Video).

140

### 141 *PCR Amplification and Sequencing*

142 Total genomic DNA was extracted from 30 mg of gill tissue by using the QIAamp DNA  
143 Mini Kit (Qiagen). DNA concentrations and quality was assessed by spectrophotometric  
144 measurements with NanoDrop (ThermoFisher Scientific Inc.). DNA samples were stored at  
145 –20 °C until processed for amplification. The detection of *C. formosanus* DNA was  
146 performed by polymerase chain reaction (PCR) targeting the ribosomal Internal Transcribed  
147 Region 2 (ITS2), using the primer pair 3S (5'-GGTACCGGTGGATCACTCGGCTCGTG-  
148 3') and BD2 (5'-TATGCTTAAATTCAGCGGGT-3'), previously described [15,37].As  
149 these primers are not specific for *C. formosanus*, we designed the species-specific primers  
150 ITS2\_Centr\_F 5'-ATGAAGAGCGCAGCCAAC-3' and ITS2\_Centr\_R 5'-  
151 CGTGCAATGTTTGCATCGGA-3'to amplify a 393 bp fragment of the ITS2 region. PCR  
152 products were visualized by 1.5% agarose gel electrophoresis. Subsequently, the amplicons  
153 were cloned into the pSC-A-amp/kan vector (Agilent), sequenced using the T3 and T7  
154 plasmid primers and analyzed using an ABI 310 Genetic Analyzer (Applied Biosystems).  
155 The obtained sequences were examined through BLAST analysis.

156

## 157 **Results**

158 Over the total of 30 healthy zebrafish examined, 20 showed miliar gill cystic lesions (Fig.  
159 1). Cysts were small and elliptical. Inside the cysts, the coiled mature metacercariae were  
160 characterized by a large, dark, X-shaped excretory bladder (occupying the majority of the  
161 body caudal portion) and by 32 circumoral spines surrounding the oral sucker, arranged in  
162 two rows. The shape of the excretory bladder and the number of circumoral spines are  
163 considered the most reliable characteristics in species identification within the genus  
164 *Centrocestus*, with *C. formosanus* characterized by an X-shaped excretory bladder and 32  
165 circumoral spines, (S1 Video and Fig. 2)[15,20,25,44,45]. Nevertheless, given that larval  
166 morphology might be confounding and that counting the number of circumoral spines might  
167 be challenging in some specimens [25], molecular analysis was conducted to confirm their  
168 taxonomic attribution. All the infected samples were positive to PCR amplification of the  
169 ribosomal ITS2 region fragment. However, the nucleotide sequence of the amplicons  
170 obtained with the primer pair 3S/BD2 [15,37] corresponds to the ITS2 fragment of the host  
171 *Danio rerio*. On the contrary, the species-specific primers designed in the present work  
172 amplify a fragment of 393 bp showing ~99% nucleotide identity with the homolog ITS2  
173 sequences of *C. formosanus* present in GenBank(S2).

174

## 175 **Discussion**

176 The occurrence of *C. formosanus* infection in zebrafish in Italy underlines the importance of  
177 focusing the attention on this invasive parasite, since this is the second case reported in the  
178 Italian peninsula [37]. Despite its origin and distribution was initially restricted to  
179 Asia[4,5,12–15,17,20,21,25], *C. formosanus* has been subsequently reported from Central  
180 and South America, Australia, and more recently Europe [13–15,18–  
181 21,23,25,26,31,33,45,46]. Actually, to the authors' knowledge, this is the fourth case of *C.*

182 *formosanus* infection in freshwater fish imported in Europe [29,37,42]and one of the most  
183 relevant in terms of number of infected animals, confirming the introduction of this parasite  
184 in the European area, as well as the possible underestimation of these infections.

185 The worldwide expansion of *C. formosanus* should be concerning for its ability to infect  
186 both ecologically and commercially valuable fish species [20,23,24,31].Indeed, *C.*  
187 *formosanus* metacercariae were detected on the gills of many freshwater fish species, with  
188 varying degrees of prevalence and severity [4–6,13,15,16,20,21,23,25,29,32,34,36,47].It has  
189 been hypothesized that different immunological responses across fish species might be  
190 responsible for mechanisms of resistance to parasite infection, although it has not been  
191 clearly determined [20,26,31,34].The lesions produced are very similar in all susceptible fish  
192 species [23,24,26], consisting in gill hyperemia and congestion, lamellar fusion and  
193 subsequent distortion of the architecture and reduction of the respiratory  
194 surface[20,21,23,24,32,33].These lesions eventually lead to low tolerance to hypoxia,  
195 respiratory difficulties and death [21,25,29,34]. This is particularly important under stressful  
196 environmental conditions(e.g. high temperatures, overcrowding and low water exchange),  
197 usually experienced in fish farms, where afflicted fish might exhibit decreased feeding rate,  
198 delayed development and mortality, resulting in the reduction of production and important  
199 economic losses[15,18–20,29,33–36].

200 Concerning the definitive hosts, both mammals and birds (e.g. canids, cats, rodents, anurans,  
201 pigeons, chickens, ducks, herons, cormorants, pelicans) have been reported to be suitable  
202 natural or experimental hosts[10,13,18–20,24,25].Nevertheless, the majority of literature  
203 addressed the qualitative aspects of infection in definitive hosts, and only recently  
204 quantitative aspects have been investigated[10,27].*C. formosanus* has been described  
205 causing lesions (e.g. fusion of *villi*, hyperplasia of crypts, epithelial damage) in the small  
206 intestine of experimentally infected herons and rats [21]. Similarly to fish hosts, the intensity



207 of infection and the immune status of the host seemed related to the degrees of damage in  
208 definitive hosts [45].

209 In this regard, humans are also at risk of infection, and fish-borne trematodes have emerged  
210 as public health problems in Asia, especially in riverside areas, where the riparian  
211 populations are infected by consumption of raw and/or undercooked fish, containing  
212 infective *larvae* (i.e., metacercariae) [7,29,45]. *C. formosanus* was not as prevalent as other  
213 fish-borne trematodes, but cases of human infection were reported in the Lao PDR,  
214 Vietnam, Thailand, Korea [12,13,15,19,20,25,34,41]. Symptoms might vary from epigastric  
215 pain to indigestion, occasionally accompanied by diarrhea, although the relationship of these  
216 symptoms with *C. formosanus* infection was unclear, because the described patients were  
217 also infected by other trematodes [5,22,28,29]. To date, no human cases have been described  
218 in the areas recently invaded by this parasite (e.g. US, Mexico, Brazil), nor in Europe  
219 [29,45]. However, further investigation should be conducted, in order to keep a high level of  
220 attention on this issue [6,20,45].

221 The recent occurrence of *C. formosanus* in new hosts and countries suggests that its range is  
222 still expanding, possibly ending up into areas where it was not present, Europe  
223 included [19,20,29]. The causes of this global spread are still subject of debate: some authors  
224 pointed at the dissemination of the first intermediate host, *Melanoides tuberculata*, whereas  
225 others hold responsible the movements of birds and freshwater fish, including the trade of  
226 ornamental species [13,18–20,26,27,29,31,32,34,35]. On one hand, the snail *M. tuberculata*  
227 has been deliberately introduced (for food and bio-control) or accidentally released (from  
228 aquaculture, aquarium trade or ballast water) in Central and South America, subsequently  
229 spreading also in the southern USA, all countries where *C. formosanus* infections have been  
230 reported [13,18,20,23,26,30,35,48]. Similarly, a *M. tuberculata* population has been reported  
231 from Germany, making this area suitable for the completion of *C. formosanus* cycle and its  
232 establishment [29,49]. On the other hand, the importation of ornamental freshwater fish from

233 countries where *C. formosanus* is endemic likely plays a crucial role in the spreading of this  
234 parasite [28].Indeed, Asian countries are the major traders in the ornamental fish industry,  
235 exporting a wide range of species into Europe, which represents the largest global trade  
236 bloc, with the United Kingdom as the main importer and Italy at the 6<sup>th</sup> position[29,41,50]. In  
237 2017, the estimated number of aquaria in Europe was 16,565,000, corresponding to  
238 approximately 300 million ornamental fish[51]. Of more than 2500 species involved in the  
239 ornamental fish industry, over 60% are of freshwater origin, and *D. rerio* is listed among the  
240 30 species dominating the market. The trade largely relies on captive-bred fish, but  
241 significant numbers of specimens are also collected from the wild [41]. The top ten  
242 freshwater fish suppliers to Europe are: Singapore, Israel, Japan, Indonesia, Thailand, Sri  
243 Lanka, Colombia, China, Vietnam and Malaysia [41,50], most of them involved with *C.*  
244 *formosanus* infections[4–6,13–15,18,21,22,24,25,29,35,45].

245 Therefore, the main concerns are the spreading of this parasite in European freshwater  
246 habitats, due to intentional or accidental release of infected imported fish, and the resulting  
247 environmental, economic, and health implications[29,31].Primarily, some aspects of biology  
248 and epidemiology should be further explored in Europe[14,20], such as the presence and  
249 distribution of intermediate and definitive hosts, for the maintenance of the life cycle, or the  
250 prevalence of infection, particularly in second intermediate fish hosts[5,26,30,35].Another  
251 important element to consider is the likelihood of future cases of human infection, even if to  
252 date there have been no reports [8,24].Several strategies, to prevent the introduction and  
253 establishment of *C. formosanus* into non-endemic areas, have been proposed and tested  
254 during the last years [19,35]. Teams of experts in “one health” control should be the first  
255 actors involved in applying good management and efficient measures, especially during the  
256 intentional movement of animals, such as border inspection, accompanying health  
257 certification, quarantine measures, and, if necessary, treatment (prior to export or upon  
258 arrival) and disinfection procedures [29,33,46]. Additionally, adequate strategies should be

259 applied in aquaculture facilities, including training of traders and farmers, regular  
260 examination of farmed fish, elimination of snail populations, avoidance of dispersal of  
261 farmed fish, and prevention of access to other species, especially birds and  
262 mammals[15,18,20,29,30,33,34].

263 The current report draws the attention on *C. formosanus* as an invasive parasite, as well as  
264 on other species that might be similarly introduced in Europe, underlining the need of  
265 epidemiological studies and appropriate preventive and control programs, in order to  
266 monitor their occurrence and prevent their negative consequences for economy, biodiversity,  
267 and animal and public health [14,20,29,30,33,46,52]. For these reasons, we propose a fast,  
268 cheap and specific PCR-based method to assess the infection of *C. formosanus* in zebrafish  
269 starting from small pieces of gill tissue of the host and avoiding elaborate collection of the  
270 metacercariae. The use of the parasite-specific primers eludes the frequent problem of the  
271 amplification of the host DNA and makes this method suitable also to detect this invasive  
272 parasite in other potential hosts. Specific recommendations concerning the diseases in  
273 ornamental fish should be strictly followed, as reported by Passantino et al. [53]. The  
274 mobilization of these animals, given the potential transmission of zoonoses from one  
275 country to others, should be better considered on the basis of good practices in diagnosing  
276 these potential pathogens. This control program might preserve animal and human  
277 international health, limiting the introduction and transfer of aquatic organism pathogens.  
278 We suggest also a proficient clinic approach developing new strategies in microbiology and  
279 epidemiology to better explore this new globalization-derived invasive species.

280

### 281 **Acknowledgements**

282 This research received no specific grant from any funding agency in the public, commercial,  
283 or not-for-profit sectors. We would like to acknowledge and thank Dr. Adriana Petrovici and

284 Laura Pacifico, DVM, Ph. D students for their precious support in fish gills microscopy  
285 image acquisition.

286

### 287 **Declaration of Interest Statement**

288 The authors declare having no conflict of interest.

289

### 290 **References**

291

292[1] Olson PD, Cribb TH, Tkach VV, Bray RA, Littlewood DTJ. 2003. Phylogeny and  
293 classification of the Digenea (Platyhelminthes: Trematoda). *Int J Parasitol* 33:733–55.  
294 doi:10.1016/S0020-7519(03)00049-3.

295[2] Sohn WM, Na BK, Cho SH, Lee SW, Choi SB, Seok WS. 2015. Trematode metacercariae  
296 in freshwater fish from water systems of hantangang and imjingang in Republic of Korea.  
297 *Korean J Parasitol* 53:289–98. doi:10.3347/kjp.2015.53.3.289.

298[3] Choe S, Park H, Lee D, Kang Y, Jeon HK, Eom KS. 2018. Infections with digenean  
299 trematode metacercariae in two invasive alien fish, *micropterus salmoides* and *lepomis*  
300 *macrochirus*, in two rivers in chungcheongbuk-do, republic of Korea. *Korean J*  
301 *Parasitol* 56:509–13. doi:10.3347/kjp.2018.56.5.509.

302[4] Chai JY, Sohn WM, Na BK, Yong TS, Eom KS, Yoon CH, Hoang EH, Jeoung HG, Socheat  
303 D. 2014. Zoonotic Trematode metacercariae in fish from Phnom Penh and Pursat,  
304 Cambodia. *Korean J Parasitol* 52:35–40. doi:10.3347/kjp.2014.52.1.35.

305[5] Chai JY, Sohn WM, Na BK, Park JB, Jeoung HG, Hoang EH, Htoon TT, Tin HH. 2017.  
306 Zoonotic trematode metacercariae in fish from yangon, Myanmar and their adults recovered  
307 from experimental animals. *Korean J Parasitol* 55:631–41. doi:10.3347/kjp.2017.55.6.631.

308[6] Krailas D, Veeravechsukij N, Chuanprasit C, Boonmekam D, Namchote S. 2016. Prevalence  
309 of fish-borne trematodes of the family Heterophyidae at Pasak Cholasid Reservoir, Thailand.

- 310 Acta Trop 156:79–86. doi:10.1016/j.actatropica.2016.01.007.
- 311[7] World Health Organization. Control of foodborne trematode infections, WHO Tech. Rep.  
312 Ser. No. 849; 1995. p. 1–157. [L]  
[SEP]
- 313[8] Pulido-Murillo EA, Furtado LF V., Melo AL, Rabelo ÉML, Pinto HA. 2018. Fishborne  
314 zoonotic trematodes transmitted by *Melanoides tuberculata* snails, Peru. Emerg Infect Dis  
315 24:606–8. doi:10.3201/eid2403.172056.
- 316[9] Sohn WM, Na BK, Cho SH, Ju JW, Lee SW, Seok WS. 2018. Infections with zoonotic  
317 trematode metacercariae in yellowfin goby, *Acanthogobius flavimanus*, from coastal areas  
318 of Republic of Korea. Korean J Parasitol 56:259–65. doi:10.3347/kjp.2018.56.3.259.
- 319[10] Mati VLT, Pinto HA, de Melo AL. 2013. Experimental infection of swiss and akr/j mice  
320 with *Centrocestus formosanus* (trematoda: heterophyidae). Rev Inst Med Trop Sao Paulo  
321 55:133–6. doi:10.1590/s0036-46652013000200013.
- 322[11] Thaenkham U, Phuphisut O, Pakdee W, Homsuwan N, Sa-nguankiat S, Waikagul J, Nawa  
323 Y, Dung DT. 2011. Rapid and simple identification of human pathogenic heterophyid  
324 intestinal fluke metacercariae by PCR-RFLP. Parasitol Int 60:503–6.  
325 doi:10.1016/j.parint.2011.09.004.
- 326[12] Nishigori M. 1924. On a new trematode *Stamnosoma formosanum* n. sp. and its life history.  
327 Taiwan Igakkai. Zasshi 1924;234:181-228. [L]  
[SEP]
- 328[13] Salgado-Maldonado G, Rodriguez-Vargas MI, Campos-Perez JJ. Metacercariae of  
329 *Centrocestus formosanus* (Nishigori, 1924) (Trematoda) in Freshwater Fishes in Mexico and  
330 their Transmission by the Thiarid Snail *Melanoides tuberculata*. Stud Neotrop Fauna  
331 Environ 1995;30:245–50. doi:10.1080/01650529509360963.
- 332[14] Yousif F, Ayoub M, Tadros M, El Bardicy S. 2016. The first record of *Centrocestus*  
333 *formosanus* (Nishigori, 1924) (Digenea: Heterophyidae) in Egypt. Exp Parasitol 168:56–61.  
334 doi:10.1016/j.exppara.2016.06.007.
- 335[15] Wanlop A, Wongsawad C, Prattapong P, Wongsawad P, Chontanarth T, Chai JY. 2017.

- 336 Prevalence of *Centrocestus formosanus metacercariae* in ornamental fish from Chiang Mai,  
337 Thailand, with molecular approach using ITS2. *Korean J Parasitol* 55:445–9.  
338 doi:10.3347/kjp.2017.55.4.445.
- 339[16] Chai JY, Sohn WM, Jung BK, Yong TS, Eom KS, Min DY, Insisengmay B, Insisiengmay S,  
340 Phommasack B, Rim HJ. 2015. Intestinal helminths recovered from humans in Xieng  
341 Khouang Province, Lao PDR with a particular note on *Haplorchis pumilio* infection. *Korean*  
342 *J Parasitol* 2015;53:439–45. doi:10.3347/kjp.2015.53.4.439.
- 343[17] Komatsu S, Kimura D, Paller VG V., Uga S. 2014. Dynamics of *Centrocestus armatus*  
344 Transmission in Endemic River in Hyogo Prefecture, Japan. *Trop Med Health* 42:35–42.  
345 doi:10.2149/tmh.2013-34.
- 346[18] Ximenes RF, Gonçalves ICB, Miyahira IC, Pinto HA, Melo AL, Santos SB. 2016..  
347 *Centrocestus formosanus* (Trematoda: Heterophyidae) in *Melanoides tuberculata*  
348 (Gastropoda: Thiaridae) from Vila do Abraão, Ilha Grande, Rio de Janeiro, Brazil. *Brazilian*  
349 *J Biol* 77:318–22. doi:10.1590/1519-6984.13615.
- 350[19] Pinto HA, Gonçalves NQ, López-Hernandez D, Pulido-Murillo EA, Melo AL. 2018. The  
351 life cycle of a zoonotic parasite reassessed: Experimental infection of *Melanoides*  
352 *tuberculata* (Mollusca: Thiaridae) with *Centrocestus formosanus* (Trematoda:  
353 Heterophyidae). *PLoS One* 13:1–13. doi:10.1371/journal.pone.0194161.
- 354[20] Scholz T, Salgado-Maldonado G. 2000. The Introduction and Dispersal of *Centrocestus*  
355 *formosanus* (Nishigori, 1924) (Digenea: Heterophyidae) in Mexico: A Review. *Am Midl*  
356 *Nat* 143:185–200. doi:10.1674/0003-0031(2000)143[0185:tiadoc]2.0.co;2.
- 357[21] Sumuduni BGD, Munasinghe DHN, Arulkanthan A. 2018. Chronological analysis of the  
358 damages caused by the metacercariae of *Centrocestus formosanus* in the gills of *Cyprinus*  
359 *carpio* and lesions caused by the adult flukes in *Ardeola ralloides*: An experimental study .  
360 *Int J Vet Sci Med* 6:165–71. doi:10.1016/j.ijvsm.2018.08.006.
- 361[22] Chai JY, Yong TS, Eom KS, Min DY, Jeon HK, Kim TY, Jung BK, Sisabath L,

- 362 Insisiengmay B, Phommasack B, Rim HJ. 2013. Hyperendemicity of *Haplorchis taichui*  
363 infection among riparian people in Saravane and Champasak province, Lao PDR. *Korean J*  
364 *Parasitol* 51:305–11. doi:10.3347/kjp.2013.51.3.305.
- 365[23] Mitchell AJ, Salmon MJ, Huffman DG, Goodwin AE, Brandt TM. 2000. Prevalence and  
366 pathogenicity of a heterophyid trematode infecting the gills of an endangered fish, the  
367 fountain darter, in two central Texas spring-fed rivers. *J Aquat Anim Health* 12:283–9.  
368 doi:10.1577/1548-8667(2000)012<0283:PAPOAH>2.0.CO;2.
- 369[24] Vélez-Hernández EM, Constantino-Casas F, García-Márquez LJ, Osorio-Sarabia D. 1998.  
370 Gill lesions in common carp, *Cyprinus carpio* L., in Mexico due to the metacercariae of  
371 *Centrocestus formosanus*. *J Fish Dis* 21:229–32. doi:10.1046/j.1365-2761.1998.00091.x.
- 372[25] Wongsawad C, Wongsawad P, Sukontason K, Maneepitaksanti W, Nantararat N. 2017.  
373 Molecular phylogenetics of *Centrocestus formosanus* (Digenea: Heterophyidae) originated  
374 from freshwater fish from Chiang Mai Province, Thailand. *Korean J Parasitol* 55:31–7.  
375 doi:10.3347/kjp.2017.55.1.31.
- 376[26] Mitchell AJ, Goodwin AE, Salmon MJ, Brandt TM. 2002. Experimental Infection of an  
377 Exotic Heterophyid Trematode, *Centrocestus formosanus*, in Four Aquaculture Fishes. *N*  
378 *Am J Aquac* 64:55–9. doi:10.1577/1548-8454(2002)064<0055:EIOAEH>2.0.CO;2.
- 379[27] Pinto HA, Mati VLT, de Melo AL. 2015. Experimental centrocestiasis: Worm burden,  
380 morphology and fecundity of *Centrocestus formosanus* (Trematoda: Heterophyidae) in  
381 dexamethasone immunosuppressed mice. *Parasitol Int* 64:236–9.  
382 doi:10.1016/j.parint.2015.02.002.
- 383[28] El-Azazy OME, Abdou NEMI, Khalil AI, Al-Batel MK, Majeed QAH, Henedi AAR.  
384 Tahrani LMA. 2015. Potential zoonotic trematodes recovered in stray cats from Kuwait  
385 municipality, Kuwait. *Korean J Parasitol* 53:279–87. doi:10.3347/kjp.2015.53.3.279.
- 386[29] Mehrdana F, Jensen HM, Kania PW, Buchmann K. 2014. Import of exotic and zoonotic  
387 trematodes (Heterophyidae: *Centrocestus* sp.) in *Xiphophorus maculatus*: Implications for

- 388 ornamental fish import control in Europe. *Acta Parasitol* 59:276–83. doi:10.2478/s11686-  
389 014-0237-z.
- 390[30] Tolley-Jordan LR, Chadwick MA. 2019. Effects of Parasite Infection and Host Body Size  
391 on Habitat Associations of Invasive Aquatic Snails: Implications for Environmental  
392 Monitoring. *J Aquat Anim Health* 31:121–8. doi:10.1002/aah.10059.
- 393[31] Frankel VM, Hendry AP, Rolshausen G, Torchin ME. 2015. Host preference of an  
394 introduced “generalist” parasite for a non-native host. *Int J Parasitol* 45:703–9.  
395 doi:10.1016/j.ijpara.2015.03.012.
- 396[32] Huston DC, Cantu V, Huffman DG. 2014. Experimental Exposure of Adult San Marcos  
397 Salamanders and Larval Leopard Frogs to the Cercariae of *Centrocestus formosanus* . *J*  
398 *Parasitol* 100:239–41. doi:10.1645/13-419.1.
- 399[33] Soler-Jiménez LC, Paredes-Trujillo AI, Vidal-Martínez VM. 2017. Helminth parasites of  
400 finfish commercial aquaculture in Latin America. *J Helminthol* 91:110–36.  
401 doi:10.1017/s0022149x16000833.
- 402[34] Ortega C, Fajardo R, Enríquez R. 2009. Trematode *Centrocestus formosanus* infection and  
403 distribution in ornamental fishes in Mexico. *J Aquat Anim Health* 21:18–22.  
404 doi:10.1577/H07-022.1.
- 405[35] Pinto HA, Mati VLT, Melo AL. 2014. Metacercarial infection of wild Nile tilapia  
406 (*Oreochromis niloticus*) from Brazil. *Sci World J*. doi:10.1155/2014/807492.
- 407[36] Mendoza-Estrada LJ, Hernández-Velázquez VM, Arenas-Sosa I, Flores-Pérez FI, Morales-  
408 Montor J, Penã-Chora G. 2016. Anthelmintic Effect of *Bacillus thuringiensis* Strains against  
409 the Gill Fish Trematode *Centrocestus formosanus*. *Biomed Res Int*.  
410 doi:10.1155/2016/8272407.
- 411[37] Iaria C, Migliore S, Macri D, Bivona M, Capparucci F, Gaglio G, Marino F. 2019. Evidence  
412 of *Centrocestus formosanus* (Nishigori, 1924) in Zebrafish (*Danio rerio* ). *Zebrafish*.  
413 doi:10.1089/zeb.2019.1744.



- 414[38] Kint P, Mahesh G, Panwar Y. 2013. Mapping of Zebrafish Research: A Global Outlook.  
415 Zebrafish 10:510–7. doi:10.1089/zeb.2012.0854.
- 416[39] Borrelli L, Aceto S, Agnisola C, De Paolo S, Dipineto L, Stilling RM, Dinan TG, Cryan JF,  
417 Menna LF, Fioretti A. 2016. Probiotic modulation of the microbiota-gut-brain axis and  
418 behaviour in zebrafish. Sci Rep 6:1–9. doi:10.1038/srep30046.
- 419[40] Ornamental Fish International. Retrieved from: [https://www.ofish.org/ornamental-fish-](https://www.ofish.org/ornamental-fish-industry-data)  
420 [industry-data](https://www.ofish.org/ornamental-fish-industry-data).
- 421[41] Dey VK. 2016. The Global Trade in Ornamental Fish. Infofish 4:52–5.
- 422[42] Gjurčević E, Petrinc Z, Kozarić Z, Kuzir S, GjurčevićK, Vičemilo M, Dzaja P. 2007.  
423 Metacercariae of *Centrocestus formosanus* in goldfish (*Carassius auratus* L.) imported into  
424 Croatia. Helminthologia 44:214–6. doi:10.2478/s11687-007-0034-4.
- 425[43] Westerfield M. 2007. The Zebrafish Book: A Guide for the Laboratory Use of Zebrafish  
426 (*Danio rerio*). Eugene (OR): University of Oregon Press.
- 427[44] Sohn WM, Na BK, Cho SH, Ju JW, Kim CH, Yoon KB, Kim JD, Son DC, Lee SW. 2018.  
428 Infections with *Centrocestus armatus* metacercariae in fishes from water systems of major  
429 rivers in republic of Korea. Korean J Parasitol 56:341–9. doi:10.3347/kjp.2018.56.4.341.
- 430[45] Chai JY, Sohn WM, Yong TS, Eom KS, Min DY, Lee MY, Lim H, Insisiengmay B,  
431 Phommasack B, Rim HJ. 2013. *Centrocestus formosanus* (Heterophyidae): Human  
432 Infections and the Infection Source in Lao PDR. J Parasitol 99:531–6. doi:10.1645/12-37.1.
- 433[46] Evans BB, Lester RJG. 2001. Parasites of ornamental fish imported into Australia. Bull Eur  
434 Assoc Fish Pathol 21:51–5.
- 435[47] Eom KS, Park HS, Lee D, Sohn WM, Yong TS, Chai JY, Min DY, Rim HJ, Insisiengmay  
436 B, Phommasack B. 2015. Infection status of zoonotic trematode metacercariae in fishes from  
437 Vientiane municipality and Champasak Province in Lao PDR. Korean J Parasitol 53:447–  
438 53. doi:10.3347/kjp.2015.53.4.447.
- 439[48] Clusa L, Miralles L, Basanta A, Escot C, García-Vázquez E. 2017. eDNA for detection of

- 440 five highly invasive molluscs. A case study in urban rivers from the Iberian Peninsula. PLoS  
441 One 12:1–14. doi:10.1371/journal.pone.0188126.
- 442[49] Glöer P 2002. Die Süßwassergastropoden Nord- und Mitteleuropas: Bestimmungsschlüssel,  
443 Lebensweise, Verbreitung. Die Tier welt Deutschlands. 73. Teil. Conch Books,  
444 Hackenheim, Germany, 327 pp.
- 445[50] OATA. 2017. EU Ornamental Fish Import & Export Statistics 2016 (Third Countries &  
446 Intra-EU Community trade). Westbury (UK).
- 447[51] FEDIAF. 2017. European Facts&Figures2017. Bruxelles.
- 448[52] Chai JY, Murrell KD, Lymbery AJ. 2005. Fish-borne parasitic zoonoses: Status and issues.  
449 Int J Parasitol 35:1233–54. doi:10.1016/j.ijpara.2005.07.013.
- 450[53] Passantino A, Macrì D, Coluccio P, Foti F, Marino F. 2008. Importation of mycobacteriosis  
451 with ornamental fish: Medico-legal implications. Travel Med Infect Dis 6:240–4.  
452 doi:10.1016/j.tmaid.2007.12.003.

453

#### 454 **Figure Captions and Legends**

455

#### 456 **Fig. 1. Gills of an infected zebrafish.**

457 Parasitic cysts are visible as miliar white lesions on the gill tissue(black arrow).

458

#### 459 **Fig. 2. Encysted metacercaria in the gill tissue of infected zebrafish.**

460 40X microscopy evaluation. Note the X-shaped excretory bladder (white arrow) and part of  
461 the oral sucker (black arrow).

462

#### 463 **Supplementary Materials**

464

#### 465 **S1 Video**

466 Live metacercaria encysted in the gill tissue of infected zebrafish, recorded at 40X using a  
467 Leica light microscope.  
468  
469 **S2**  
470 ITS2 sequences of *C. formosanus*.  
471

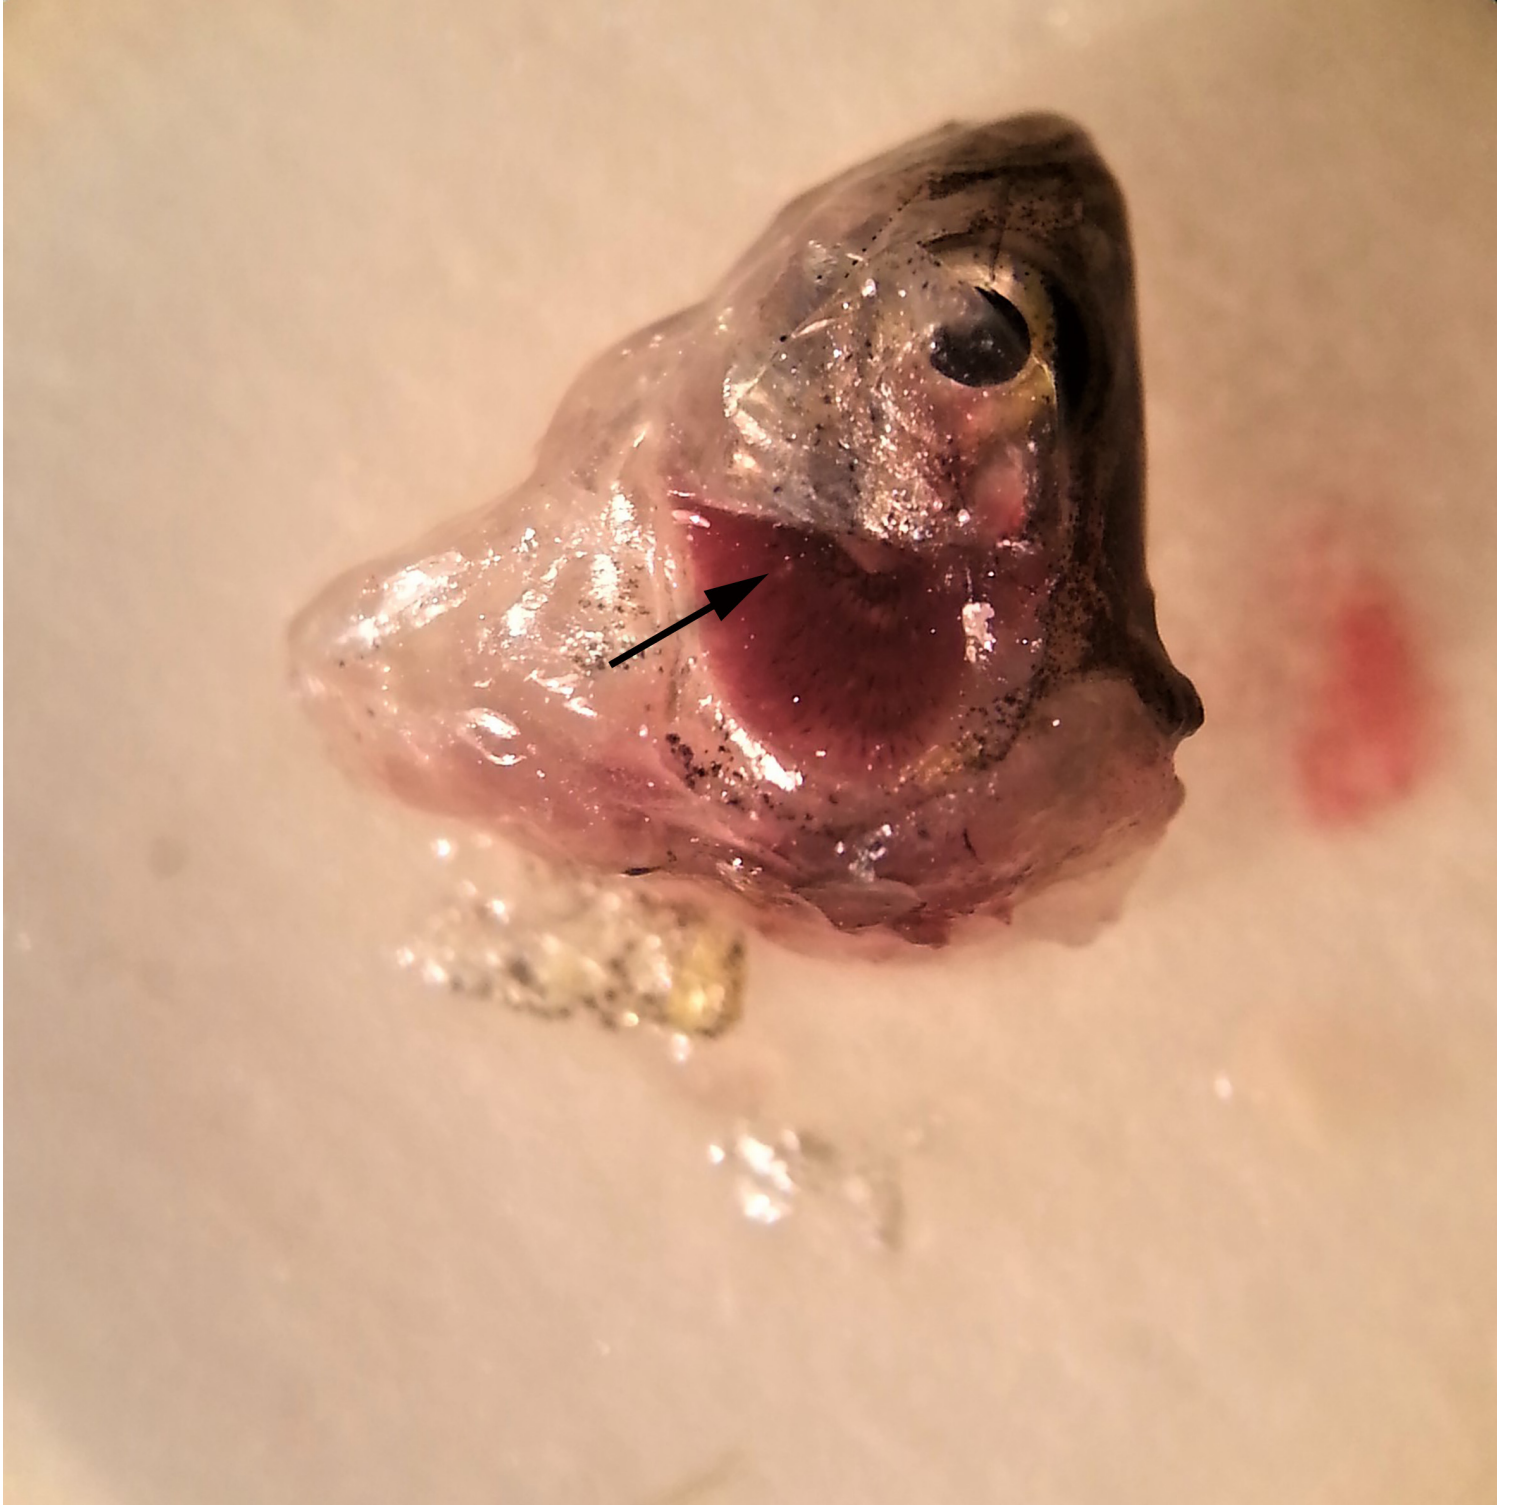

**Fig. 1. Gills of an infected zebrafish.**

Parasitic cysts are visible as miliar white lesions on the gill tissue (black arrow).

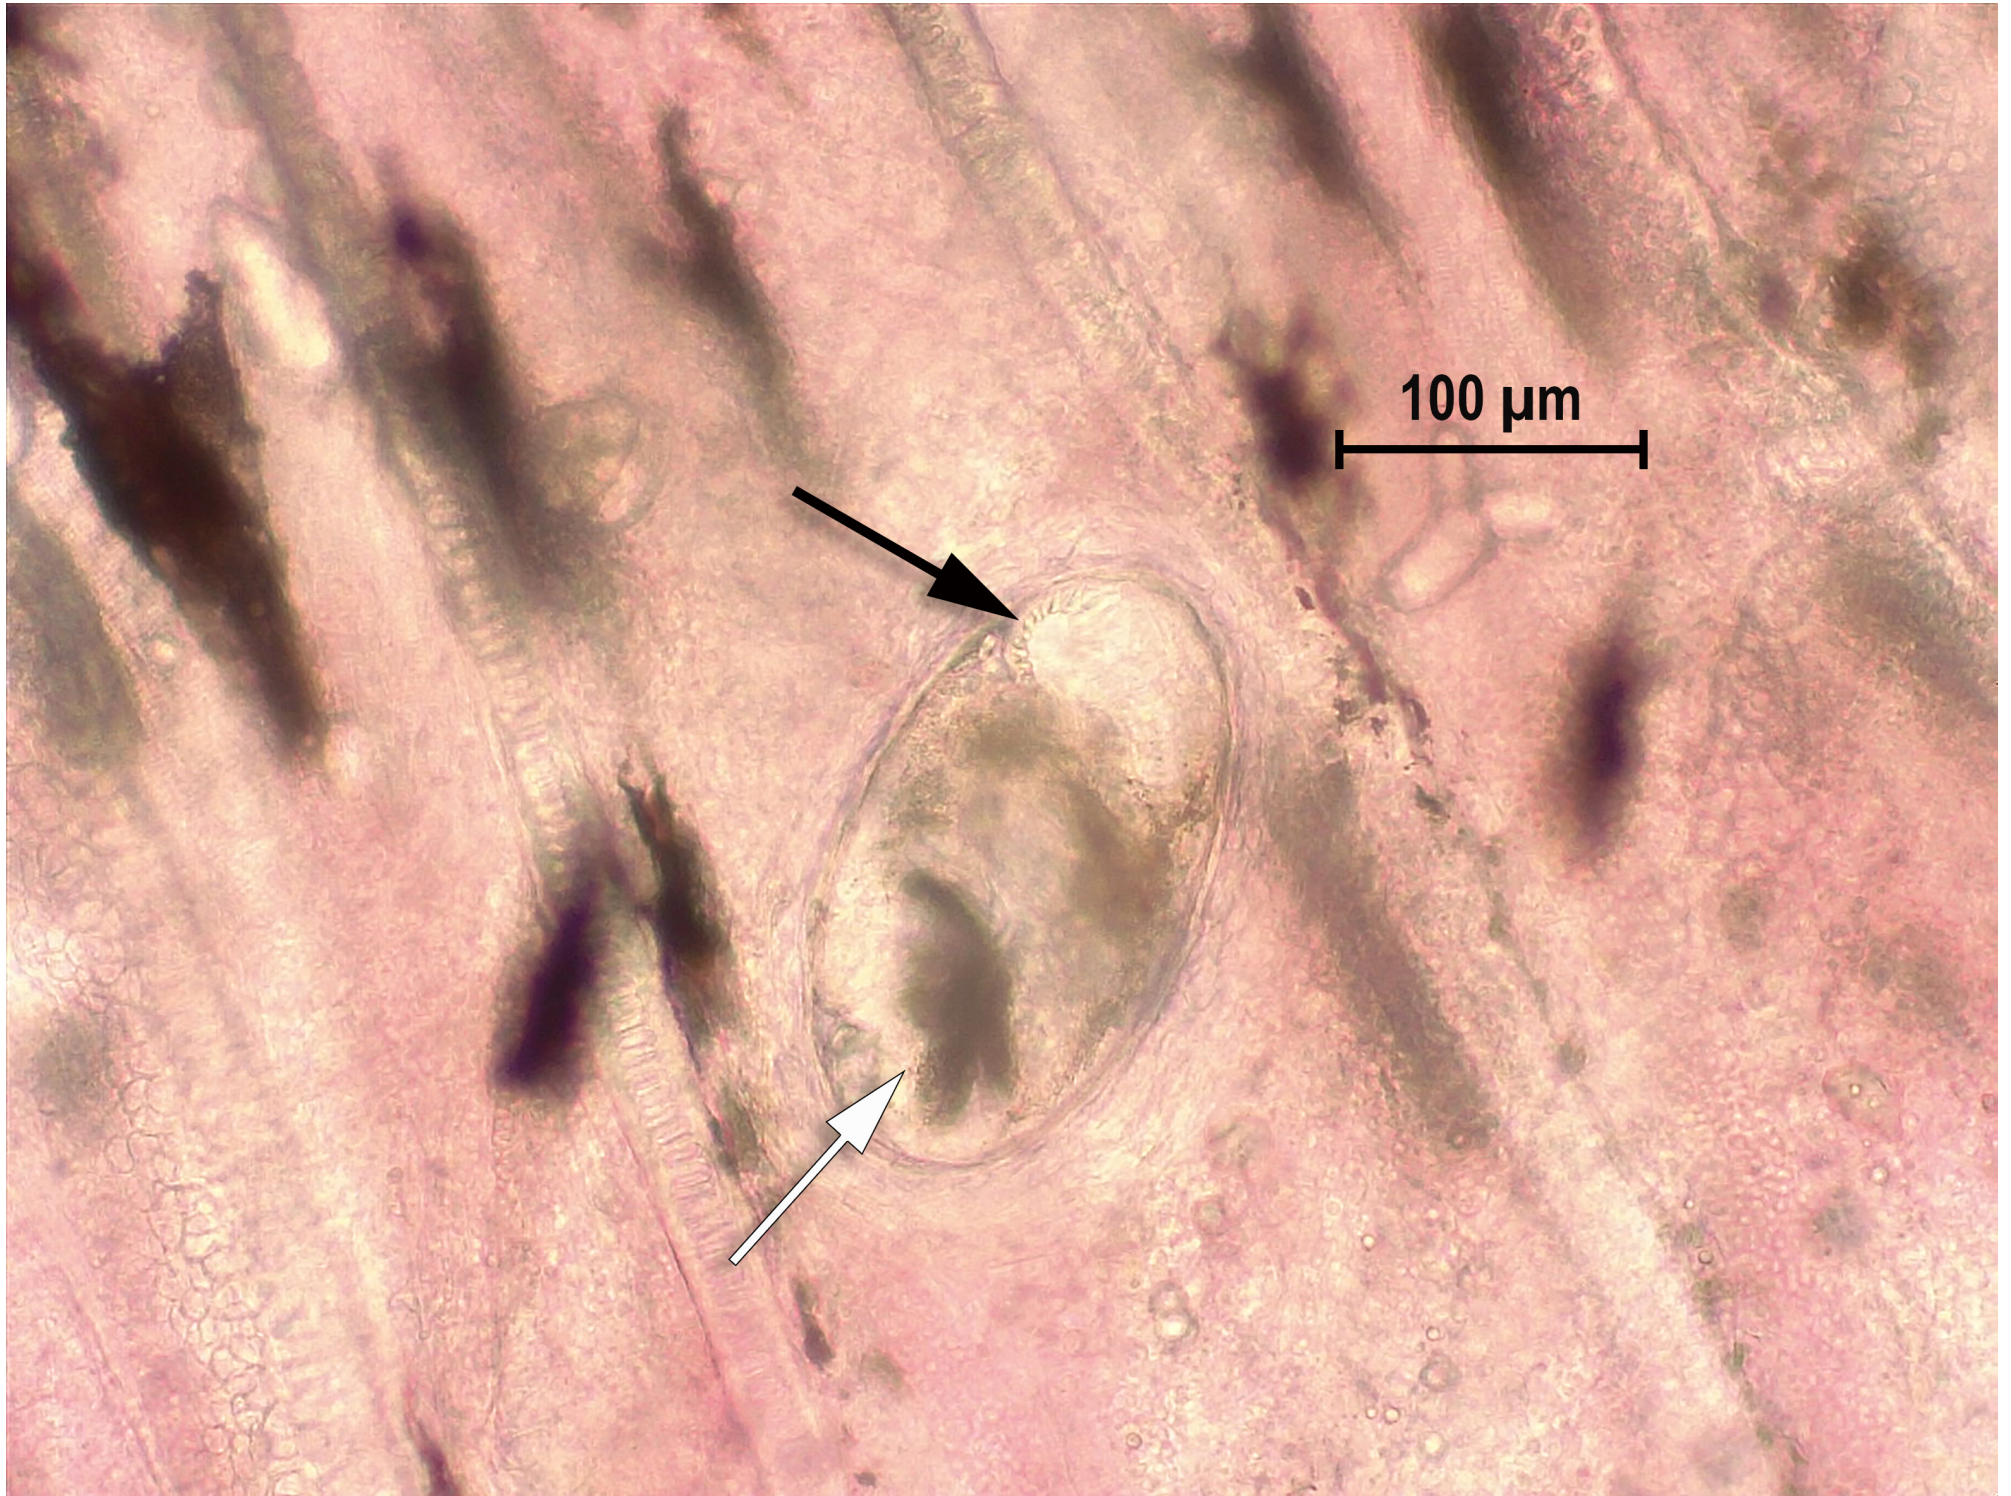

**Fig. 2. Encysted metacercaria in the gill tissue of infected zebrafish.**

40X microscopy evaluation. Note the X-shaped excretory bladder (white arrow) and part of the oral sucker (black arrow).
